# Supplementary material for: A novel colorimetric and near-infrared fluorescent probe for hydrogen peroxide imaging in vitro and in vivo
Source: Royal Society of Chemistry journal article supplement (doi:10.1039/c5ra16827a), 2015-01-01
Supplement: c5ra16827a1.pdf [file c5ra16827a1.pdf]

**Electronic Supplementary Information (ESI)**

**for**

**A Novel Colorimetric and Near-infrared Fluorescent Probe for  
Hydrogen Peroxide Imaging in Vitro and in Vivo**

Peng Wang,<sup>\*a</sup> Ke Wang,<sup>a</sup> Dan Chen,<sup>a</sup> Yibo Mao,<sup>a</sup> Yueqing Gu<sup>\*a</sup>

<sup>a</sup> *Department of Biomedical Engineering, School of Engineering, China*

*Pharmaceutical University, 210009 Nanjing, China*

**Contents**

|                                                                       |                   |
|-----------------------------------------------------------------------|-------------------|
| <b>1. Additional spectra.....</b>                                     | <b>Page S2-S3</b> |
| <b>2. Structure characterizations of probe DCM-B1 and DCM-B2.....</b> | <b>Page S4-S8</b> |

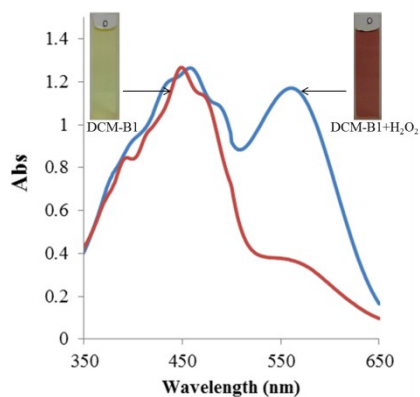

**Fig. S1** Absorption spectra of probe DCM-B1 (5  $\mu\text{M}$ ) before (red line) and after reacting with  $\text{H}_2\text{O}_2$  (100  $\mu\text{M}$ , blue line).

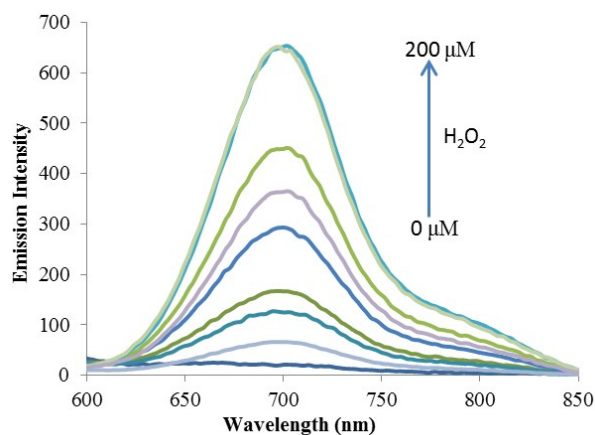

**Fig. S2** Emission spectra of probe DCM-B1 in the presence of different equivalents of  $\text{H}_2\text{O}_2$  (0, 0.5, 1.0, 2.0, 4.0, 6.0, 8.0, 10.0, 15.0, 20.0 eq, 30 min) excited at 560 nm.

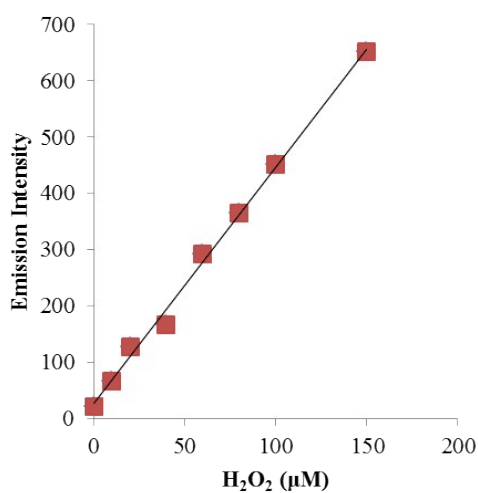

**Fig. S3** A linear correlation between emission intensities and concentrations of  $\text{H}_2\text{O}_2$ .

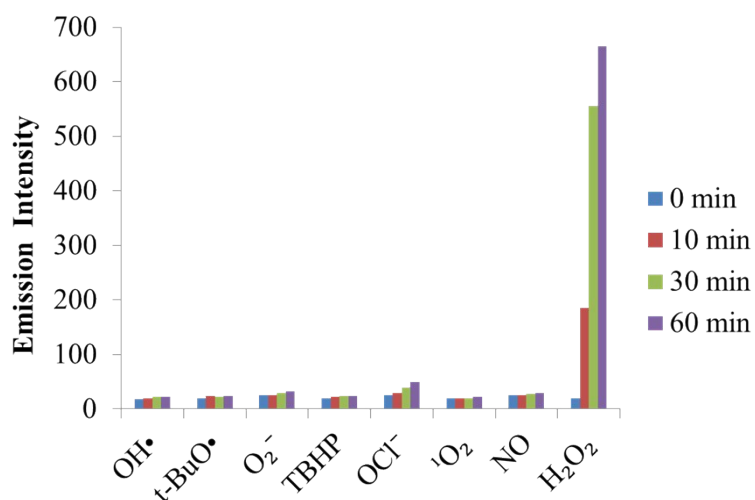

**Fig. S4** Fluorescence intensity of 5  $\mu\text{M}$  DCM-B1 to the testing species in PBS buffer solution (20 mM, 50% DMSO, pH 7.4) at 700 nm excited at 560 nm. Bars represent fluorescence intensity during 0, 10, 30 and 60 min after addition of various compounds excited at 560 nm.

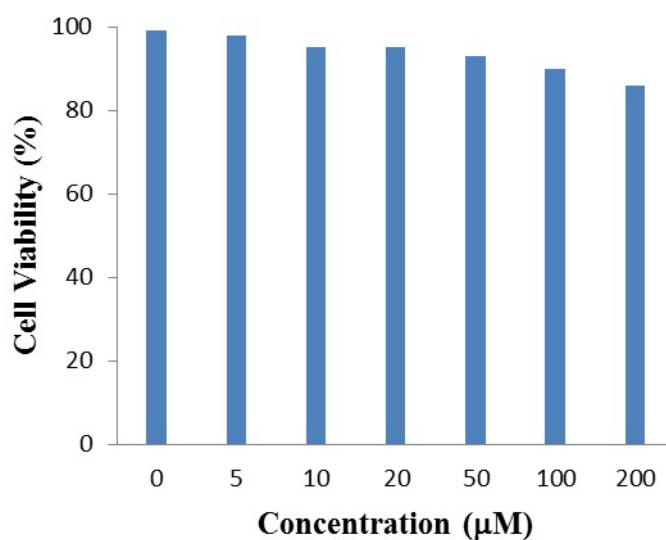

**Fig. S5** cytotoxicity of DCM-B2 probe. Cell viability of MCF-7 cells incubated with different concentration DCM-B2 probe.

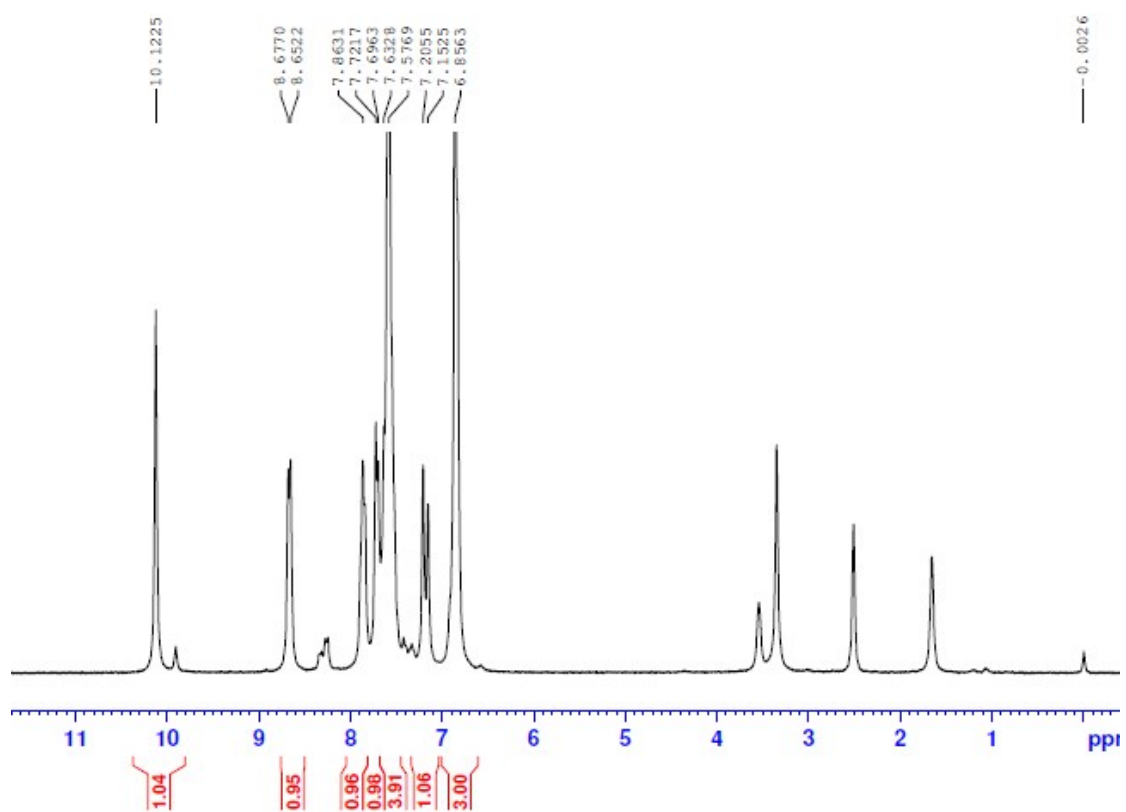

Fig. S6  $^1\text{H}$  NMR spectrum of compound DCM-OH

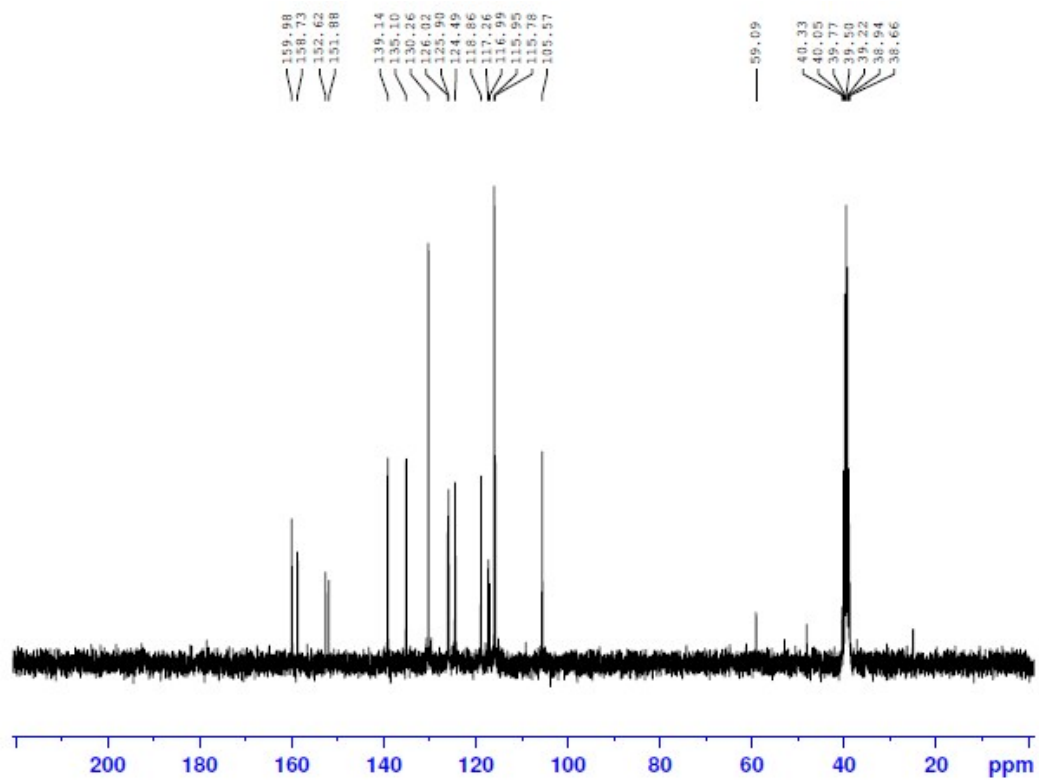

Fig. S7  $^{13}\text{C}$  NMR spectrum of compound DCM-OH

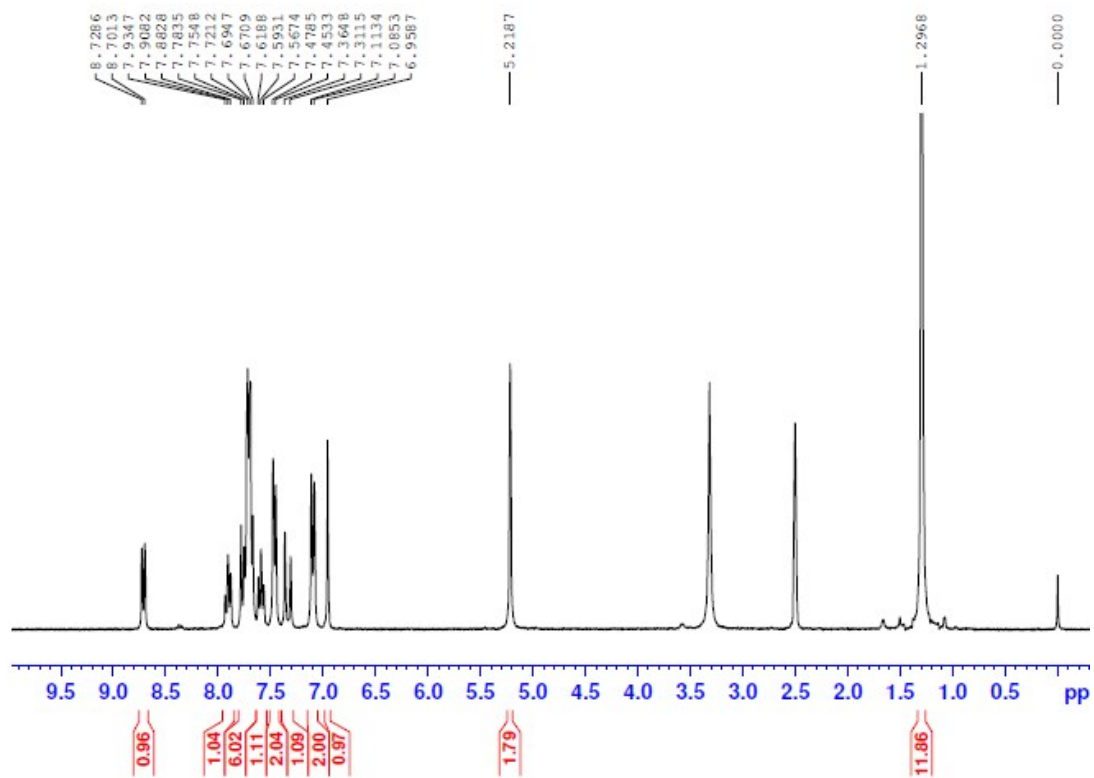

**Fig. S8**  $^1\text{H}$  NMR spectrum of compound DCM-B1

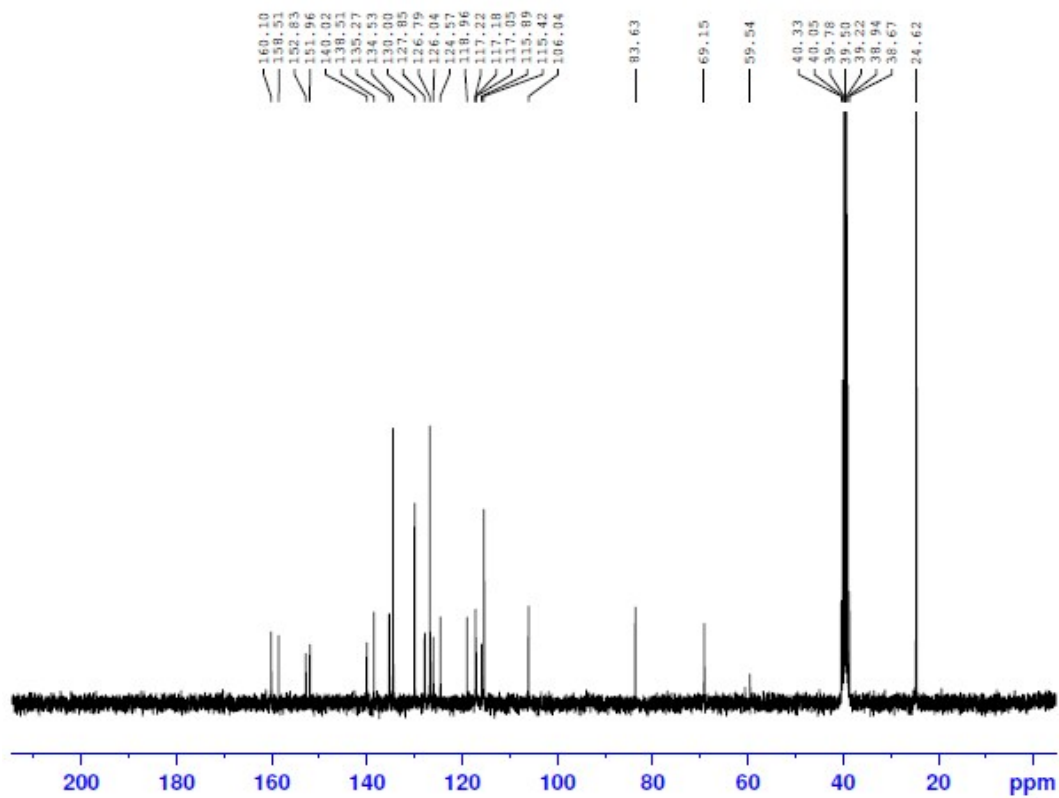

**Fig. S9**  $^{13}\text{C}$  NMR spectrum of compound DCM-B1

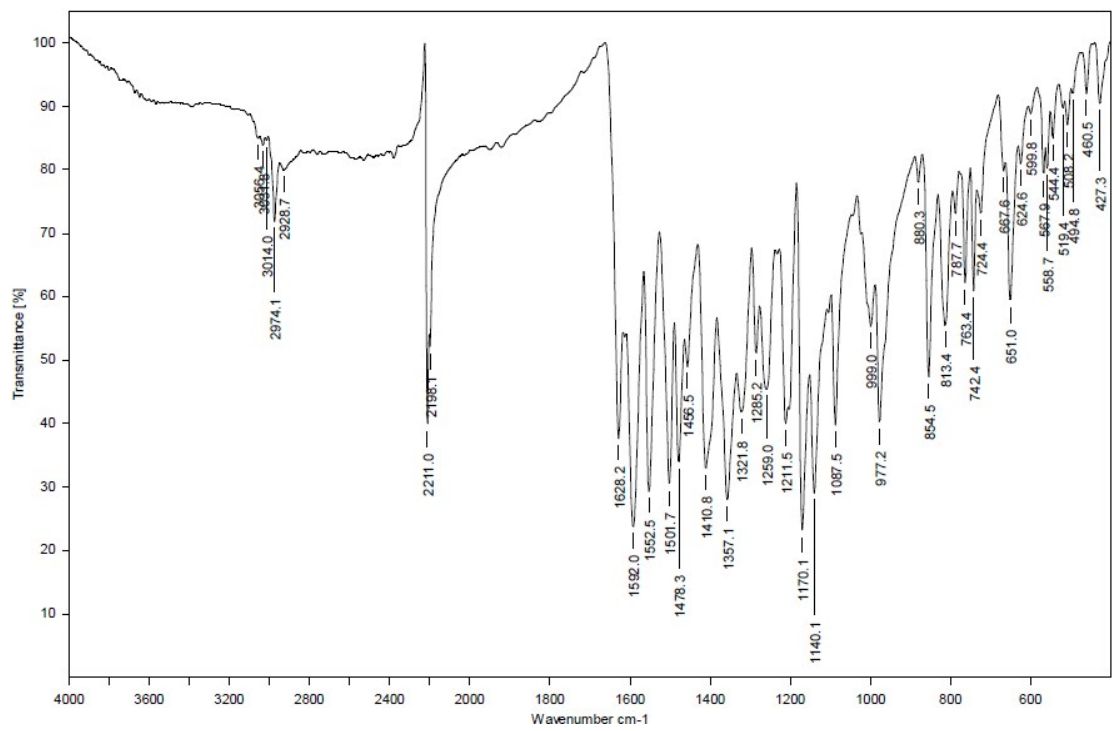

Fig. S10 IR spectrum of compound DCM-B1

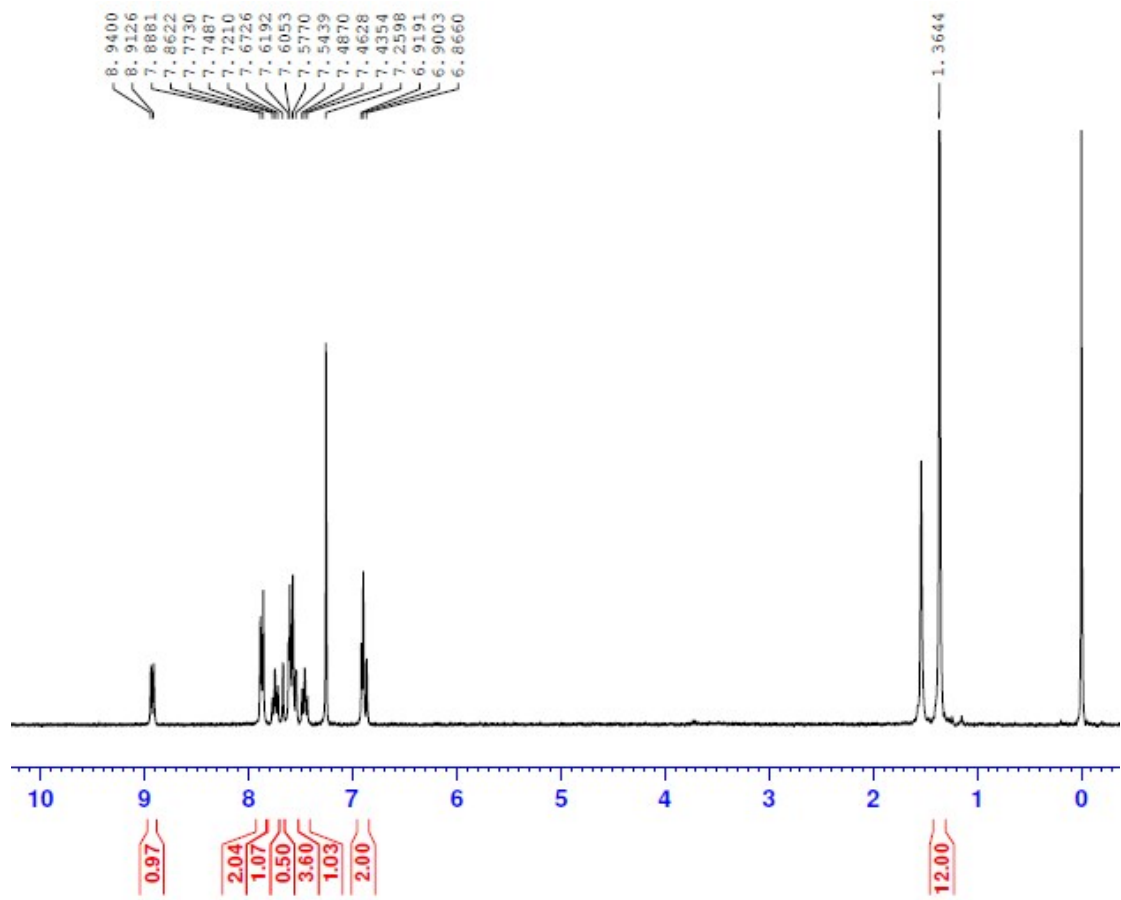

Fig. S11 <sup>1</sup>H NMR spectrum of compound DCM-B2

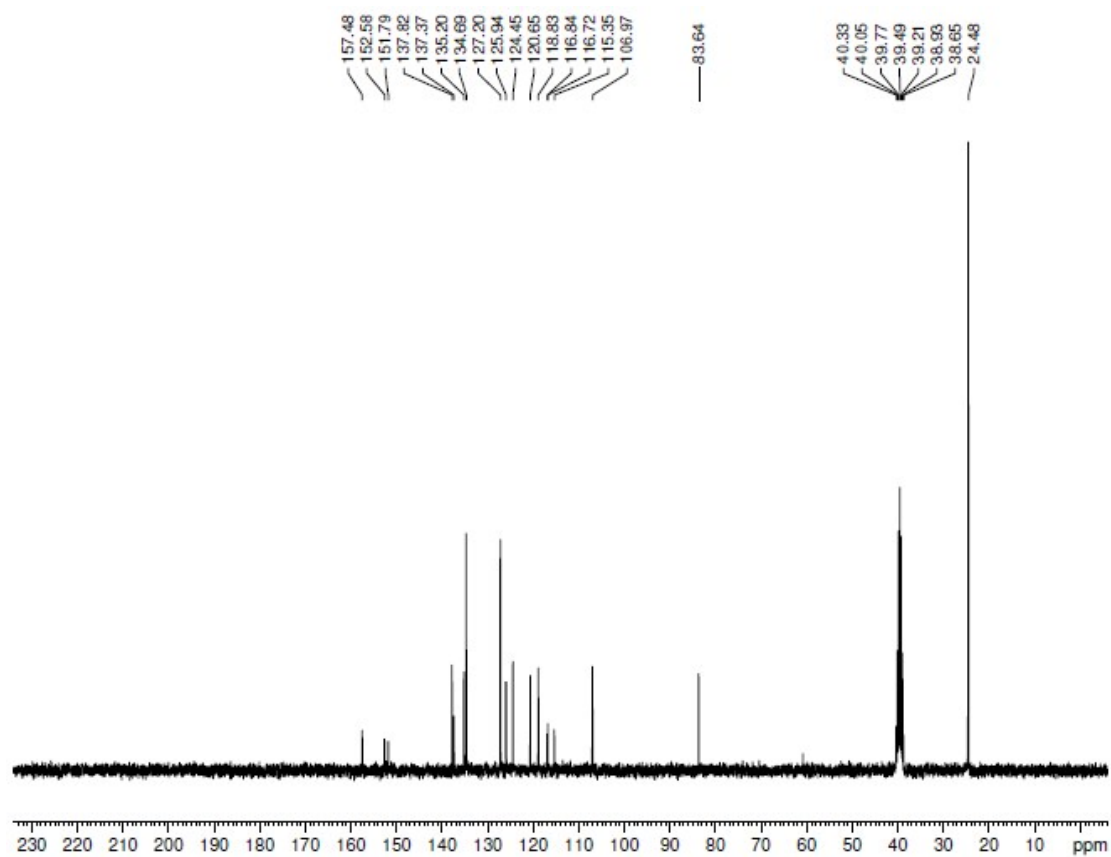

**Fig. S12**  $^{13}\text{C}$  NMR spectrum of compound DCM-B2

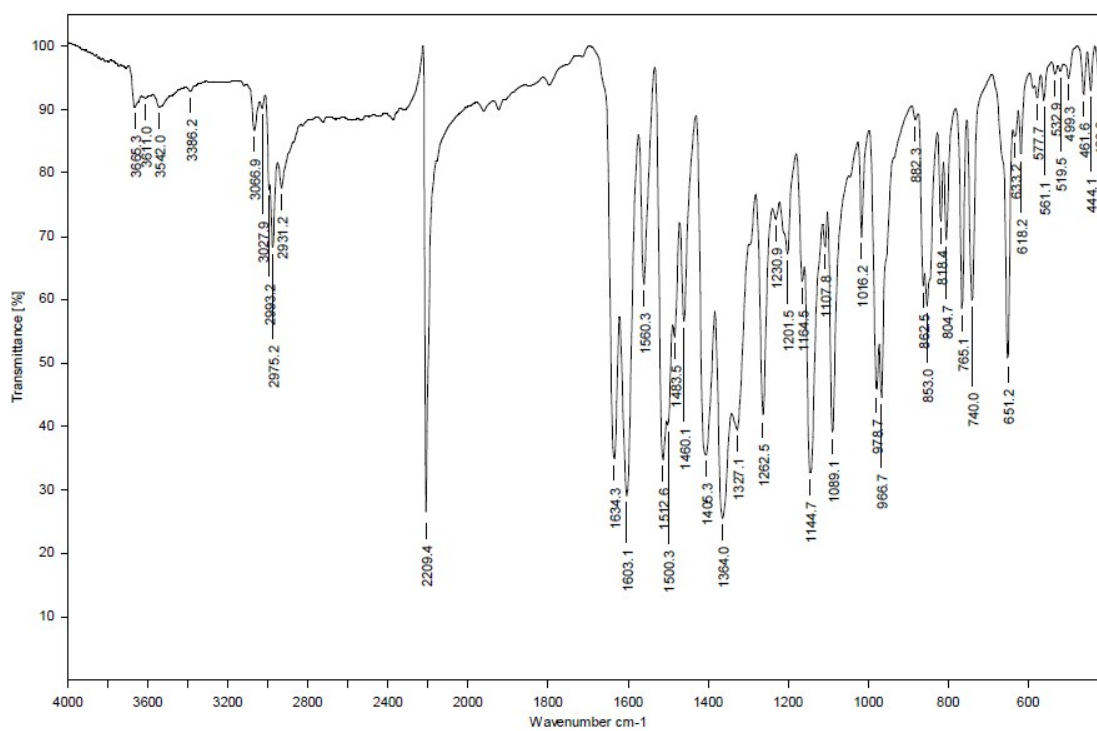

**Fig. S13** IR spectrum of compound DCM-B2

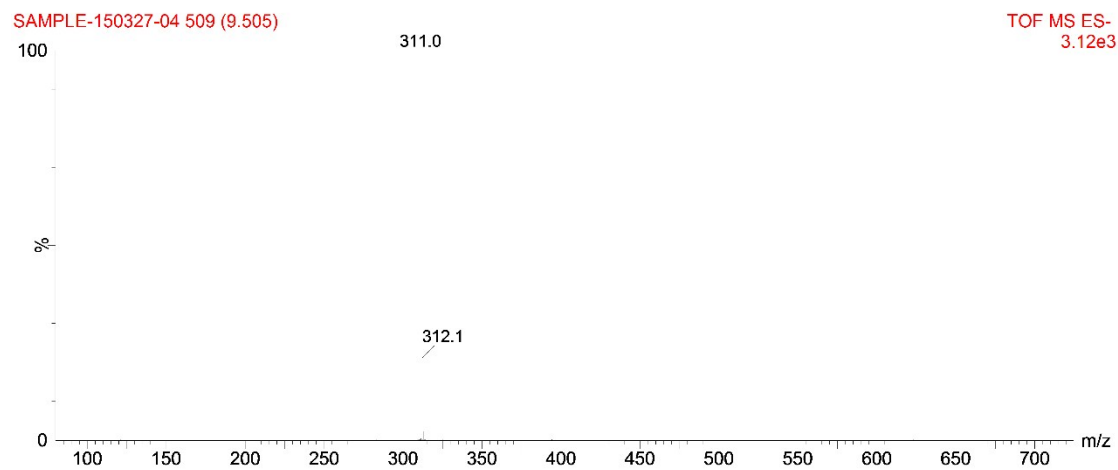

**Fig. S14** Mass spectrum of compound DCM-OH

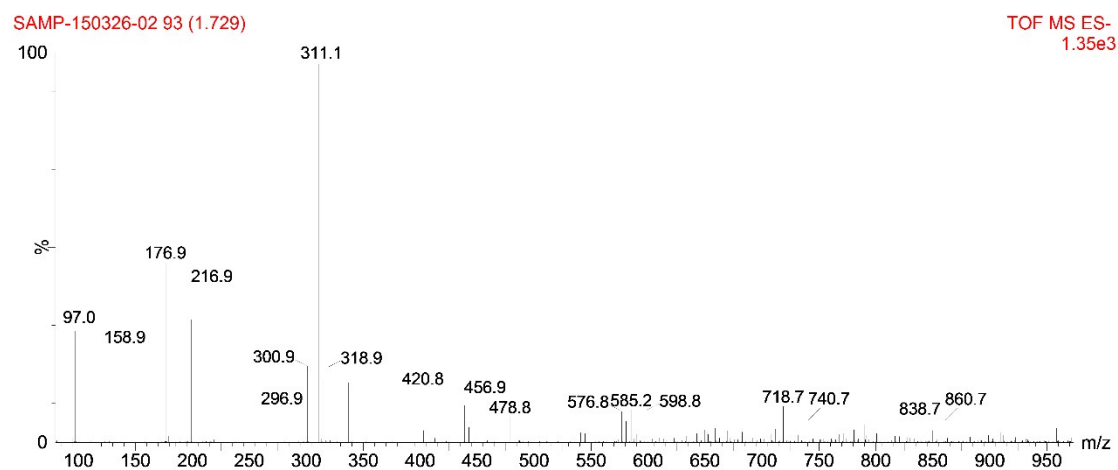

**Fig. S15** Mass spectrum of the solution of compound DCM-B2 after treated with  $H_2O_2$
